# Supplementary material for: Highly selective and sensitive sensing for Al3+ and F− based on green photoluminescent carbon dots
Source: Royal Society of Chemistry journal article supplement (doi:10.1039/c6ra19370f), 2016-01-01
Supplement: c6ra19370f1.pdf [file c6ra19370f1.pdf]

## Electronic Supporting Information

### Highly selective and sensitive sensing for Al<sup>3+</sup> and F<sup>-</sup> based on green photoluminescent carbon dots

Xiang-Ying Sun<sup>a</sup>, Lu-Lu Wu<sup>a</sup>, Jiang-Shan Shen<sup>a</sup>, Xue-Gong Cao<sup>a</sup>, Cunjin Wen<sup>a</sup>, Bin Liu<sup>a</sup>, Huai-Qian Wang<sup>b</sup>

<sup>a</sup> College of Materials Science and Engineering, Huaqiao University, Xiamen, 361021

<sup>b</sup> College of Engineering, Huaqiao University, Quanzhou, 362021

#### Table of contents in Electronic Supplementary Information:

Fig.S1 UV-vis absorption, PL excitation and emission spectra of the CDs. The inset shows the PL photos of the CDs solution under the illumination of room light (left) and of 365 nm light (right), respectively.

Fig.S2 The curve of fluorescence intensity of probe varied with temperature

Fig.S3 Fluorescence spectra of CDs at different excitation wavelength

Fig.S4 FT-IR spectra of ascorbic acid (a), glycol (b) and CDs (c)

Fig.S5 The lifetime curves of CDs in the absence (a) and presence (b) of Al<sup>3+</sup> ions (10 μM)

Fig.S6 UV-vis absorption (a) and PL excitation spectral change (b) of CDs in 50 mMTris-HCl buffer solution of pH 7.4 containing different concentration of Al<sup>3+</sup> ions (0.0, 1.0, 2.0, 3.0, 4.0, 5.0, 6.0, 7.0, 8.0, 9.0, 10.0 μM, respectively).

Table S1 Overview of detection for Al<sup>3+</sup> and F<sup>-</sup>

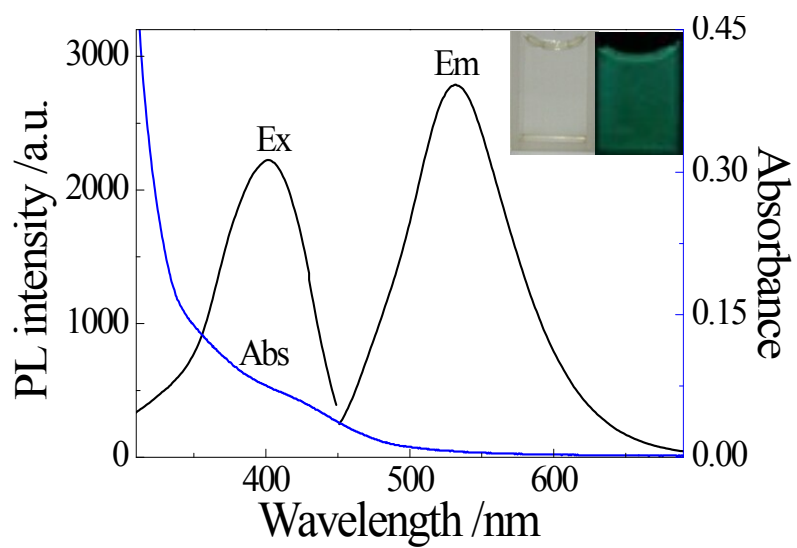

Fig. S1 UV-vis absorption, PL excitation and emission spectra of the CDs. The inset shows the PL photo of the CDs solution under the illumination of room light (left) and of 365 nm light (right), respectively.

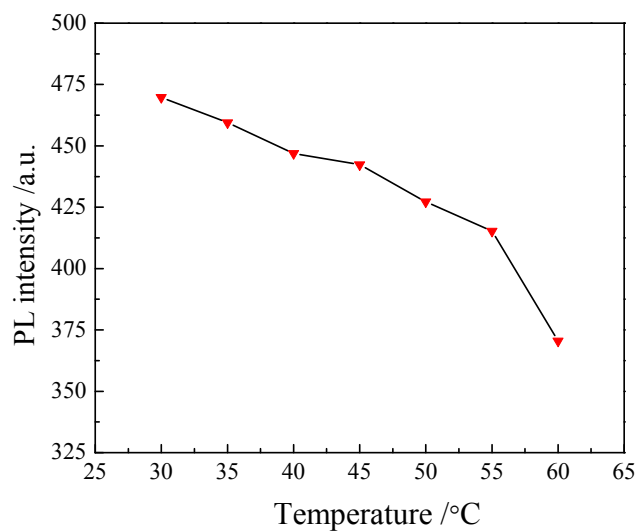

Fig. S2 The curve of fluorescence intensity of probe varied with the temperature

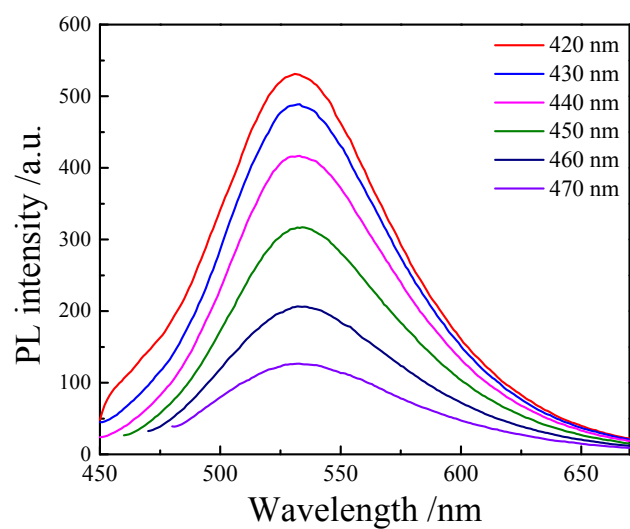

Fig. S3 Fluorescence spectra of CDs at different excitation wavelength

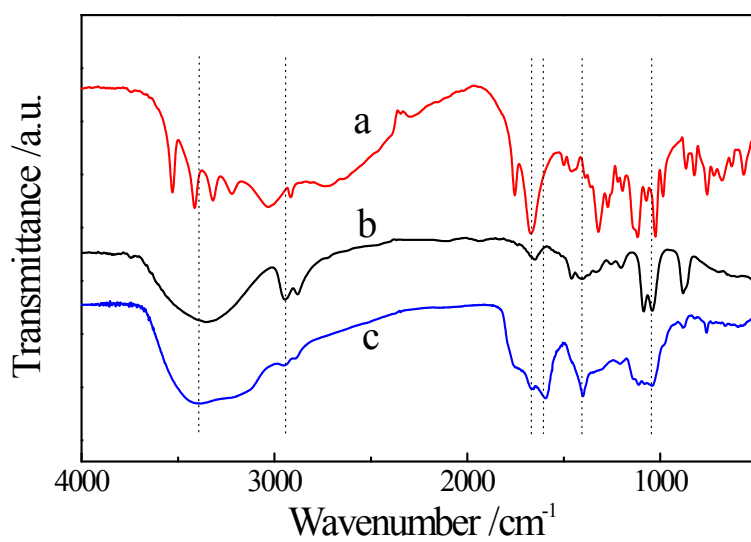

Fig.S4 FT-IR spectra of ascorbic acid (a), glycol (b) and CDs (c).

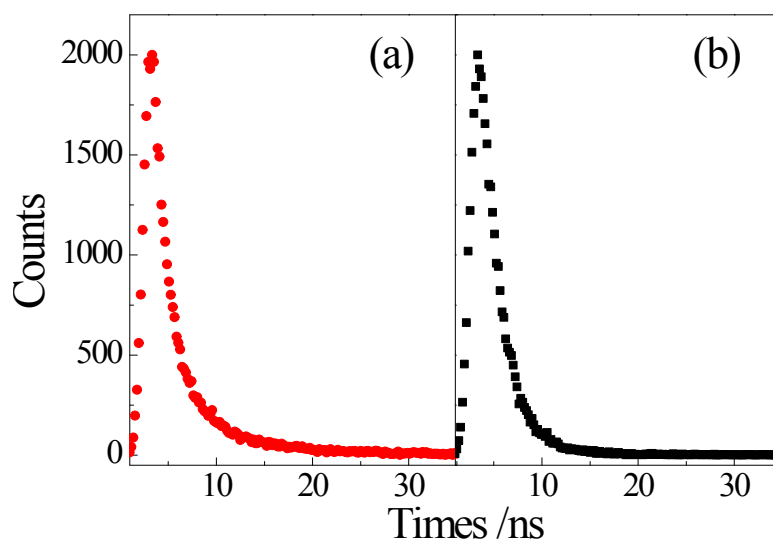

**Fig.S5** The lifetime curves of CDs in the absence (a) and presence (b) of  $\text{Al}^{3+}$  ions ( $10 \mu\text{M}$ )

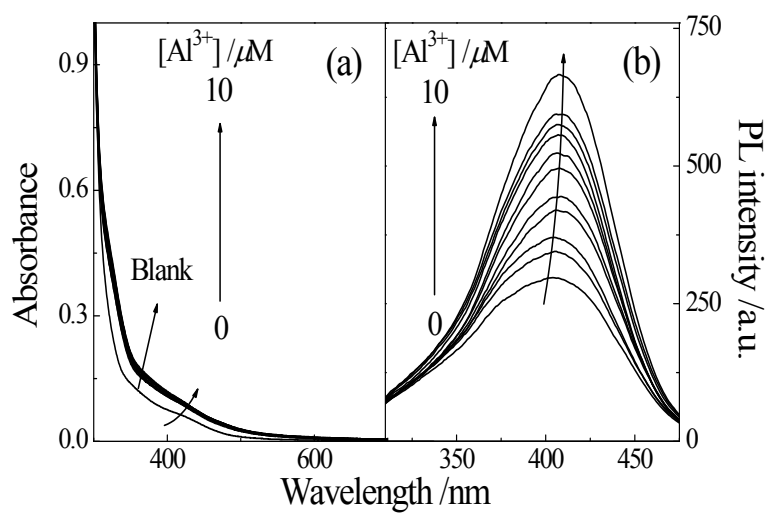

**Fig.S6** UV-vis absorption (a) and PL excitation spectral change (b) of the CDs in 50 mM Tris-HCl buffer solution of pH 7.4 containing different concentration of  $\text{Al}^{3+}$  ions (0.0, 1.0, 2.0, 3.0, 4.0, 5.0, 6.0, 7.0, 8.0, 9.0,  $10.0 \mu\text{M}$ , respectively).

Table S1 Overview of detection for Al<sup>3+</sup> and F<sup>-</sup>

| Methods          | Materials   | Detection        | Linear range( $\mu\text{M}$ ) | LOD ( $\mu\text{M}$ ) | References |
|------------------|-------------|------------------|-------------------------------|-----------------------|------------|
| Fluorescence     | RCS         | Al <sup>3+</sup> | 3.2 ~130                      | 3.2                   | <u>1</u>   |
| Fluorescence     | MCIH        | Al <sup>3+</sup> | 0.05 ~0.25                    | 0.05                  | <u>2</u>   |
| Fluorescence     | 3HFF        | Al <sup>3+</sup> | 5 ~100                        | 0.52                  | <u>3</u>   |
| Colorimetry      | GSH-AgNPs   | Al <sup>3+</sup> | 0.4 ~4.0                      | 1.2                   | <u>4</u>   |
| Fluorescence     | Alizarin    | Al <sup>3+</sup> | 3 ~45                         | 0.52                  | <u>5</u>   |
| Colorimetry      | L-AuNPs     | Al <sup>3+</sup> | 66 ~322                       | 19.6                  | <u>6</u>   |
| Fluorescence     | carbon dots | Al <sup>3+</sup> | 0.50 ~10                      | 0.39                  | This work  |
| Colorimetry      | HNHCB       | F <sup>-</sup>   | -                             | 1.3                   | <u>7</u>   |
| Fluorescence     | MPBA, PBA   | F <sup>-</sup>   | 0 ~2.6*10 <sup>4</sup>        | 1.1*10 <sup>2</sup>   | <u>8</u>   |
| Colorimetry      | E1          | F <sup>-</sup>   | 0 ~100                        | 7.3                   | <u>9</u>   |
| Electrochemistry | Spiropyran  | F <sup>-</sup>   | 0.5 ~10                       | 8.3*10 <sup>-2</sup>  | <u>10</u>  |
| Fluorescence     | TAPB        | F <sup>-</sup>   | 0.17 ~3.0                     | 0.17                  | <u>11</u>  |
| Fluorescence     | carbon dots | F <sup>-</sup>   | 0.50 ~10                      | 0.14                  | This work  |

## References:

1. H. Kim, B. A. Rao, J. W. Jeong, S. Mallick, S.-M. Kang, J. S. Choi, C.-S. Lee and Y.-A. Son, *Sensors and Actuators B: Chemical*, 2015, 210, 173-182.
2. L. Fan, J.-C. Qin, T.-R. Li, B.-D. Wang and Z.-Y. Yang, *Journal of Luminescence*, 2014, 155, 84-88.
3. S. Xu, R. Tang, Z. Wang, Y. Zhou and R. Yan, *Spectrochimica acta. Part A, Molecular and biomolecular spectroscopy*, 2015, 149, 208-215.
4. N. Yang, Y. Gao, Y. Zhang, Z. Shen and A. Wu, *Talanta*, 2014, 122, 272-277.
5. Y. Wang, L. J. Hou, Y.-B. Wu, L. L. Shi, Z. Shang and W. J. Jin, *Journal of Photochemistry and Photobiology A: Chemistry*, 2014, 281, 40-46.
6. S. Bothra, R. Kumar and S. K. Sahoo, *RSC Adv.*, 2015, 5, 97690-97695.
7. S. Ghosh, A. Ganguly, A. Bhattacharyya, M. A. Alam and N. Guchhait, *RSC Advances*, 2016, 6, 67693-67700.
8. M. Shamsipur, A. Safavi, Z. Mohammadpour and A. R. Zolghadr, *Sensors and Actuators B: Chemical*, 2015, 221, 1554-1560.

9. J. Li, X. Xu, X. Shao and Z. Li, *Luminescence*, 2015, 30, 1285-1289.
10. J. Tao, P. Zhao, Y. Li, W. Zhao, Y. Xiao and R. Yang, *Analytica chimica acta*, 2016, 918, 97-102.
11. P. Vishnoi, S. Sen, G. N. Patwari and R. Murugavel, *Journal of fluorescence*, 2016, 26, 997-1005.
